# Supplementary material for: Band gap engineering of graphenylene by hydrogenation and halogenation: a density functional theory study
Source: Royal Society of Chemistry journal article supplement (doi:10.1039/c5ra11208g), 2015-01-01
Supplement: c5ra11208g1.pdf [file c5ra11208g1.pdf]

**Band gap engineering of graphene by hydrogenation and halogenation: a  
density functional theory study**

*Wei Liu,<sup>a</sup> and Mao-sheng Miao,<sup>bc</sup> and Jing-yao Liu<sup>\*a</sup>*

*<sup>a</sup>Institute of Theoretical Chemistry, Jilin University, Changchun, P. R. China*

*<sup>b</sup>Department of Chemistry and Biochemistry, California State University, Northridge,  
CA, USA*

*<sup>c</sup>Beijing Computational Science Research Center, Beijing, P. R. China*

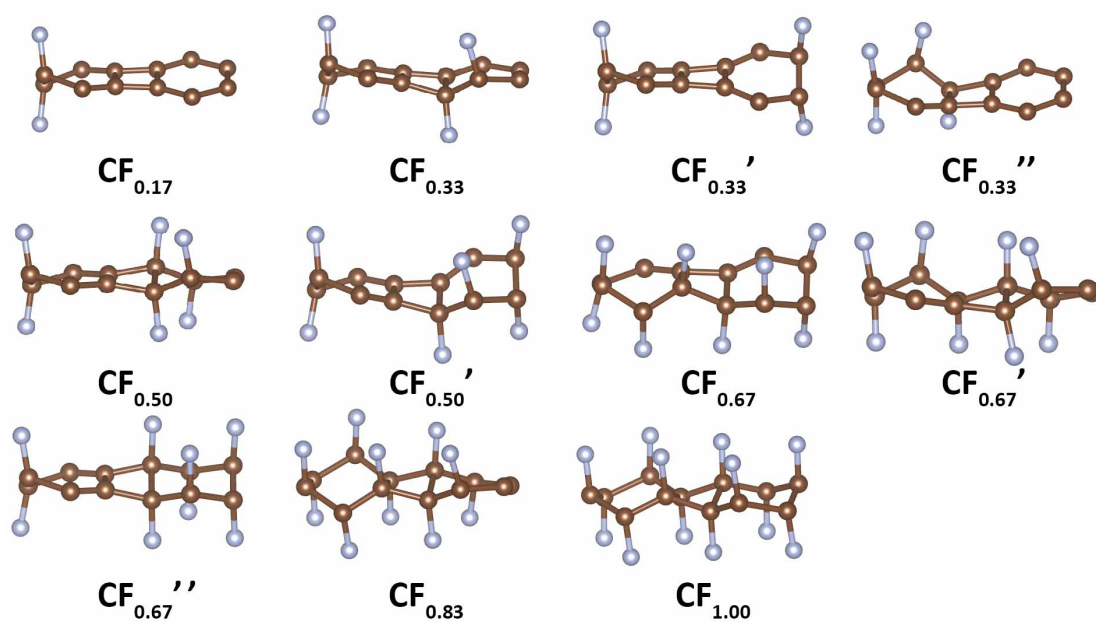

**Figure S1.** The structures of fluorinated graphenylene in one unit cell at various concentrations.

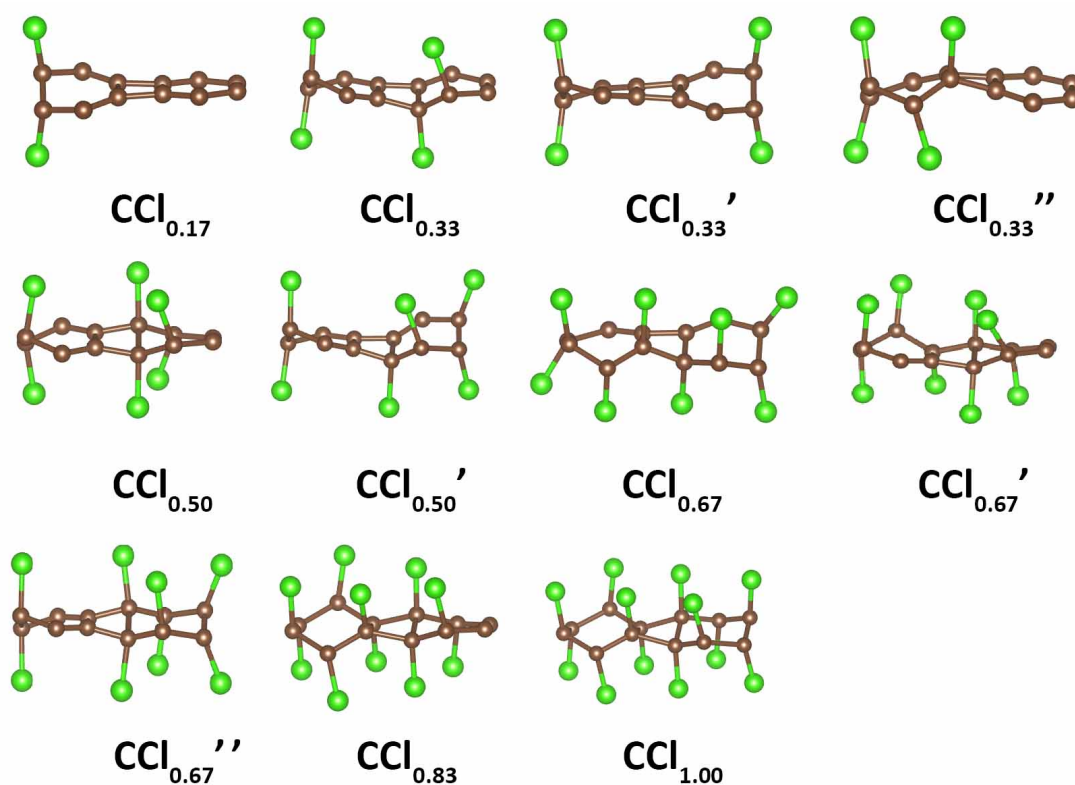

**Figure S2.** The structures of chlorinated graphenylene in one unit cell at various concentrations.

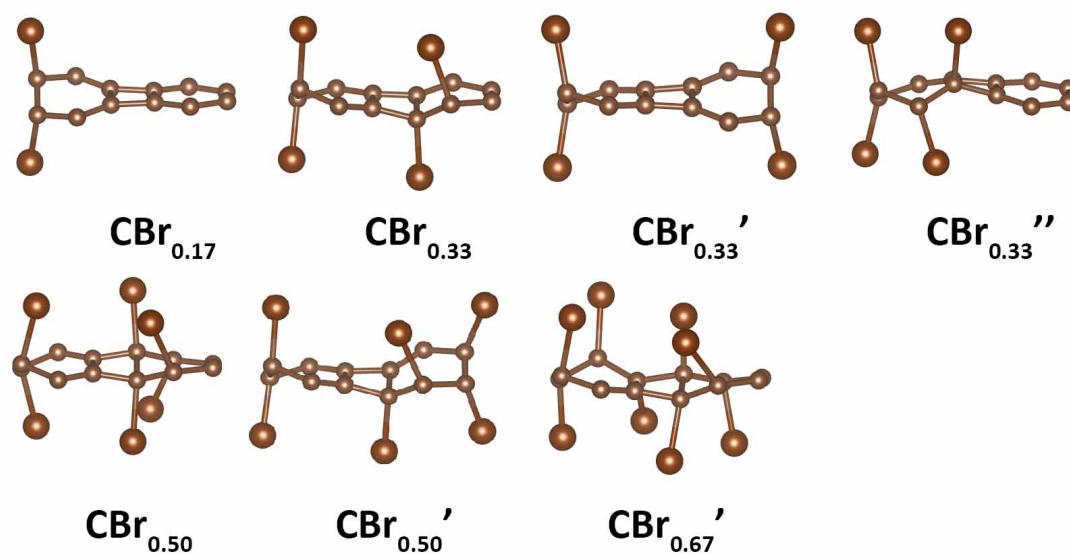

**Figure S3.** The structures of brominated graphenylene in one unit cell at various concentrations.

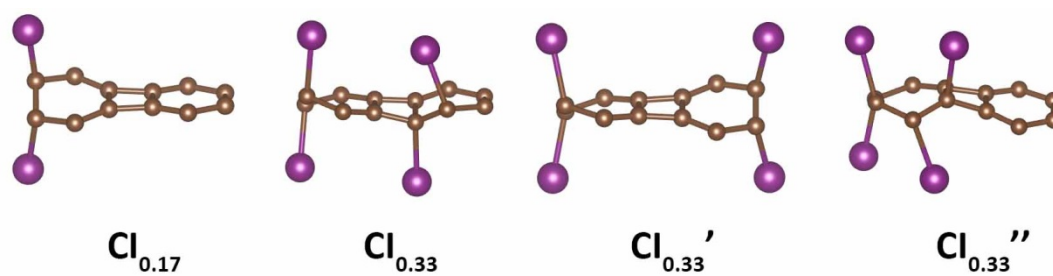

**Figure S4.** The structures of iodinated graphenylene in one unit cell at various concentrations.

**Table S1.** The calculated PBE energies of the obtained functionalized graphenylene.

The unit of the values is eV.

|                            | H        | F        | Cl       | Br       | I        |
|----------------------------|----------|----------|----------|----------|----------|
| <b>CX<sub>0.17</sub></b>   | -110.402 | -110.984 | -107.296 | -106.089 | -105.068 |
| <b>CX<sub>0.33</sub></b>   | -117.831 | -118.714 | -110.751 | -108.095 | -105.726 |
| <b>CX<sub>0.33</sub>'</b>  | -116.873 | -117.915 | -110.496 | -108.093 | -105.860 |
| <b>CX<sub>0.33</sub>''</b> | -117.680 | -118.564 | -110.524 | -107.902 | -105.491 |
| <b>CX<sub>0.50</sub></b>   | -125.136 | -125.940 | -112.055 | -107.489 | --       |
| <b>CX<sub>0.50</sub>'</b>  | -124.775 | -125.676 | -113.382 | -109.228 | --       |
| <b>CX<sub>0.67</sub></b>   | -132.900 | -133.587 | -114.199 | --       | --       |
| <b>CX<sub>0.67</sub>'</b>  | -132.893 | -133.559 | -114.205 | -107.648 | --       |
| <b>CX<sub>0.67</sub>''</b> | -132.544 | -132.936 | -113.969 | --       | --       |
| <b>CX<sub>0.83</sub></b>   | -140.779 | -141.083 | -114.573 | --       | --       |
| <b>CX<sub>1.00</sub></b>   | -148.592 | -148.311 | -114.974 | --       | --       |

**Table S2.** The calculated lattice constants of the obtained functionalized graphenylene. The unit of the values is Å.

|                            | H     | F     | Cl    | Br    | I     |
|----------------------------|-------|-------|-------|-------|-------|
| <b>CX<sub>0.17</sub></b>   | 6.724 | 6.730 | 6.721 | 6.725 | 6.727 |
| <b>CX<sub>0.33</sub></b>   | 6.639 | 6.657 | 6.623 | 6.648 | 6.671 |
| <b>CX<sub>0.33</sub>'</b>  | 6.669 | 6.656 | 6.662 | 6.673 | 6.700 |
| <b>CX<sub>0.33</sub>''</b> | 6.796 | 6.709 | 6.689 | 6.734 | 6.751 |
| <b>CX<sub>0.50</sub></b>   | 6.777 | 6.807 | 6.892 | 6.910 | --    |
| <b>CX<sub>0.50</sub>'</b>  | 6.573 | 6.441 | 6.509 | 6.572 | --    |
| <b>CX<sub>0.67</sub></b>   | 6.755 | 6.818 | 6.944 | --    | --    |
| <b>CX<sub>0.67</sub>'</b>  | 6.751 | 6.808 | 6.948 | 6.958 | --    |
| <b>CX<sub>0.67</sub>''</b> | 6.792 | 6.841 | 6.956 | --    | --    |
| <b>CX<sub>0.83</sub></b>   | 6.884 | 6.975 | 7.541 | --    | --    |
| <b>CX<sub>1.00</sub></b>   | 6.940 | 7.045 | 7.725 | --    | --    |
